# Supplementary material
Source: Elsevier journal article supplement (https://www.sciencedirect.com/science/article/pii/S2531043720301720)
Supplement: mmc1 [file S2531043720301720:mmc1.docx]

Appendix A

Table A.1. Comparison of actual and predicted values for all predictive equations of maximum respiratory mouth pressures (n=229).

| **Study, Country** | **Equation** | **Actual value, cmH2O** | **Predicted value, cmH2O** | **p-value** | **rs** | **Bias** | **95% CI** | **ICC** | **95% CI** |
| --- | --- | --- | --- | --- | --- | --- | --- | --- | --- |
| Black and Hyatt (1969)1, United States of America |  |  |  |  |  |  |  |  |  |
| Pimax ♀ | 104 – (0.51 x age) | 79.4±21.7 | 70.7±5.3 | <0.001 | 0.33 | 8.7±20.7 | -31.8🡪49.2 | -0.15 | -0.06-0.35 |
| Pimax ♂ | 143 – (0.55 x age) | 94.7±27.2 | 105.8±5.0 | <0.001 | 0.42 | -11.1±25.5 | -61.1🡪39.0 | -0.15 | -0.02-0.31 |
| Pemax♀ | 170 – (0.53 x age) | 104.9±25.5 | 135.4±5.5 | <0.001 | 0.38 | -30.5±24.1 | -77.8🡪16.8 | 0.15 | -0.06-0.35 |
| Pemax♂ | 268 – (1.03 x age) | 141.3±35.7 | 198.4±9.4 | <0.001 | 0.38 | -57.1±33.6 | -122.8🡪8.7 | 0.17 | 0.01-0.33 |
| Wilson et al. (1984)2, United Kindom |  |  |  |  |  |  |  |  |  |
| Pimax ♀ | -43 + (0.71 x Heightcm) | 79.4±21.7 | 67.6±4.6 | <0.001 | -0.06 | 11.8±22.3 | -31.9🡪55.5 | -0.006 | -0.22-0.20 |
| Pimax ♂ | 142 –(1.03 x age) | 94.7±27.2 | 72.4±9.4 | <0.001 | 0.42 | 22.4±24.8 | -26.3🡪71.1 | 0.26 | 0.10-0.40 |
| Pemax♀ | 3.5 + (0.55 x Heightcm) | 104.9±25.5 | 89.2±3.6 | <0.001 | 0.05 | 15.8±25.3 | -33.9🡪65.4 | 0.04 | -0.17-0.24 |
| Pemax♂ | 180 – (0.91 x age) | 141.3±35.7 | 118.5±8.3 | <0.001 | 0.38 | 22.8±33.7 | -43.2🡪88.8 | 0.16 | -0.01-0.31 |
| Enright et al. (1994)3, United States of America |  |  |  |  |  |  |  |  |  |
| Pimax ♀ | (0.133 Wtlbs) - (0.805 Age) + 96 | 79.4±21.7 | 62.8±9.1 | <0.001 | 0.32 | 16.6±21.0 | -24.4🡪57.5 | 0.21 | 0.006-0.40 |
| Pimax ♂ | (0.131 Wtlbs) - (1.27 Age) + 153 | 94.7±27.2 | 90.0±12.4 | 0.040 | 0.44 | 4.8±24.6 | -43.4🡪53.0 | 0.32 | 0.17-0.46 |
| Pemax♀ | (0.344 Wtlbs) - (2.12 Age) + 219 | 104.9±25.5 | 121.8±19.9 | <0.001 | 0.39 | -16.9±25.7 | -67.3🡪33.5 | 0.37 | 0.18-0.54 |
| Pemax♂ | (0.250 Wtlbs) - (2.95 Age) + 347 | 141.3±35.7 | 173.3±22.7 | <0.001 | 0.44 | -32.0±33.6 | -97.9🡪33.9 | 0.37 | 0.22-0.50 |
| Enright et al. (1995)*4, United States of America |  |  |  |  |  |  |  |  |  |
| Pimax♀ | 118 – (0.9 x age) + (0.10 x Wtlbs) | 79.4±21.7 | 73.8±9.8 | 0.032 | 0.33 | 5.6±20.9 | -35.4🡪46.5 | 0.23 | 0.03-0.42 |
| Pimax♂ | 149 – age + (0.10 x Wtlbs) | 94.7±27.2 | 98.8±9.8 | 0.058 | 0.44 | -4.1±24.7 | -52.4🡪44.3 | 0.27 | 0.11-0.42 |
| Johan et al. (1997)5 , Chia, Malaysia and India |  |  |  |  |  |  |  |  |  |
| Pimax♀ Chinese | 68.80 – (0.49 x age) – (0.05 x Heightcm) + (0.22 x Wtkg) | 79.4±21.7 | 43.6±5.7 | <0.001 | 0.31 | 35.8±20.8 | -4.9🡪76.5 | 0.15 | -0.07-0.34 |
| Pimax ♂ Chinese | 37.24 – (0.67 x age) + (0.15 x Heightcm) + (0.85 x Wtkg) | 94.7±27.2 | 84.5±12.7 | <0.001 | 0.36 | 10.3±26.0 | -40.6🡪61.2 | 0.25 | 0.09-0.40 |
| Pimax♀ Malay | 52.48 + (0.18 x age) – (0.09 x Heightcm) + (0.12 x Wtkg) | 79.4±21.7 | 58.2±2.3 | <0.001 | -0.25 | 21.3±22.4 | -22.7🡪65.2 | -0.05 | -0.26-0.16 |
| Pimax ♂ Malay | 151.32 – (0.33 x age) – (0.55 x Heightcm) + (0.38 x Wtkg) | 94.7±27.2 | 66.0±5.0 | <0.001 | 0.26 | 28.8±26.5 | -23.1🡪80.7 | 0.08 | -0.08-0.25 |
| Pimax♀ Indian | 54.65 – (0.48 x age) – (0.01 x Heightcm) + (0.24 x Wtkg) | 79.4±21.7 | 37.6±5.7 | <0.001 | 0.30 | 41.8±20.8 | 0.9🡪82.6 | 0.14 | -0.07-0.34 |
| Pimax ♂ Indian | 112.47 – (0.31 x age) – (0.31 x Heightcm)+ (0.51 x Wtkg) | 94.7±27.2 | 79.3±6.0 | <0.001 | 0.32 | 15.4±26.2 | -36.0🡪66.8 | 0.12 | -0.05-0.28 |
| Pemax ♀ Chinese | 112.14 – (0.59 x age) – (0.11 x Heightcm) – (0.07 x Wtkg) | 104.9±25.5 | 51.9±6.1 | <0.001 | 0.36 | 53.1±24.3 | 5.5🡪100.6 | 0.15 | -0.06-0.35 |
| Pemax ♂ Chinese | -106.17 – (0.52 x age) + (1.05 x Heightcm) + (1.03 x Wtkg) | 141.3±35.7 | 117.7±18.4 | <0.001 | 0.34 | 23.6±34.3 | -43.5🡪90.8 | 0.27 | 0.11-0.42 |
| Pemax ♀ Malay | 181.87 – (0.16 x age) – (0.90 x Heightcm) – (0.43 x Wtkg) | 104.9±25.5 | 2.78±8.6 | <0.001 | 0.42 | 102.1±27.8 | 47.7 🡪156.6 | -0.06 | -0.27-0.15 |
| Pemax ♂ Malay | 109.82 + (0.05 x age) – (0.22 x Heightcm) + (0.30 x Wtkg) | 141.3±35.7 | 99.7±3.0 | <0.001 | 0.18 | 41.6±35.3 | -27.5🡪110.8 | 0.03 | -0.14-0.19 |
| Pemax ♀ Indian | 130.36 – (0.49 x age) – (0.40 x Heightcm) + (0.17 x Wtkg) | 104.9±25.5 | 47.3±5.5 | <0.001 | 0.37 | 57.6±24.3 | 9.9 🡪105.3 | 0.13 | -0.08-0.33 |
| Pemax ♂ Indian | -13.66 – (0.62 x age) + (0.79 x Heightcm) + (0.06 x Wtkg) | 141.3±35.7 | 82.83±8.9 | <0.001 | 0.33 | 58.5±33.6 | -7.3 🡪124.3 | 0.17 | 0.00-0.32 |
| Morales et al. (1997)6, Spain |  |  |  |  |  |  |  |  |  |
| Pimax ♀ | (-0.64 x age) + 125.18 | 79.4±21.7 | 83.4±6.7 | 0.022 | 0.33 | -4.0±20.6 | -44.4🡪36.4 | 0.18 | -0.03-0.37 |
| Pimax ♂ | (-1.03 x age) + (0.59 x Wtkg) + 133.07 | 94.7±27.2 | 110.0±12.2 | <0.001 | 0.41 | -15.2±24.9 | -64.1🡪33.6 | 0.30 | 0.14-0.44 |
| Pemax♀ | (-0.57 x age) +( 0.65 x Wtkg) + 116.23 | 104.9±25.5 | 122.0±9.5 | <0.001 | 0.33 | -17.1±24.1 | -64.3🡪30.1 | 0.22 | 0.01-0.41 |
| Pemax♂ | (-1.31 x age) + 263.12 | 141.3±35.7 | 174.6±12.0 | <0.001 | 0.38 | -33.3±33.4 | -98.8🡪32.3 | 0.21 | 0.05-0.37 |
| Neder et al. (1999)7, Brazil |  |  |  |  |  |  |  |  |  |
| Pimax ♀ | (-0.49 x age) + 110.4 | 79.4±21.7 | 78.4±5.1 | 0.950 | 0.33 | 1.0±20.7 | -39.6🡪41.5 | 0.14 | -0.07-0.34 |
| Pimax ♂ | (-0.80 x age) + 155.3 | 94.7±27.2 | 101.2±7.3 | 0.003 | 0.42 | -6.5±25.1 | -55.6 🡪42.7 | 0.21 | 0.05-0.37 |
| Pemax♀ | (-0.61 x age) + 115.6 | 104.9±25.5 | 75.8±6.4 | <0.001 | 0.38 | 29.1±24.0 | -17.9 🡪76.2 | 0.17 | -0.04-0.36 |
| Pemax♂ | (-0.81 x age) + 165.3 | 141.3±35.7 | 110.5±7.4 | <0.001 | 0.38 | 30.8±33.8 | -35.5🡪97.0 | 0.14 | -0.03-0.30 |
| Hautmann et al. (2000)8, Germany |  |  |  |  |  |  |  |  |  |
| Pimax♀ | (-0.024 x age) + 8.55 | 79.4±21.7 | 71.2±2.5 | 0.002 | 0.33 | 8.2±21.1 | -33.1🡪49.5 | 0.07 | -0.14-0.28 |
| Pimax ♂ | (0.158 x BMI) -(0.051 x age) + 8.22 | 94.7±27.2 | 93.2±7.8 | 0.780 | 0.32 | 1.1±26.0 | -49.8🡪52.0 | 0.15 | -0.02-0.31 |
| Wohlgemuth et al. (2003)9, The Netherlands |  |  |  |  |  |  |  |  |  |
| Pimax | 7.224 – (0.0406 x age) + (0.032 x Wtkg) + 3.745 | 88.9±26.3 | 76.3±10.1 | <0.001 | 0.44 | 12.5±23.4 | -33.4🡪58.4 | 0.31 | 0.19-0.42 |
| Pemax | 7.224 – (0.0406 x age) + (0.032 x Wtkg) – (0.041 x age) | 123.2±37.0 | 101.6±14.75 | <0.001 | 0.49 | 25.1±33.3 | -40.2🡪90.3 | 0.41 | 0.30-0.51 |
| Sachs et al. (2009)10, United States of America |  |  |  |  |  |  |  |  |  |
| Pimax♀ | - 388 + (1.77 x age) + (-0.014 x age2) + (0.41 x Wtlbs) + (-0.0041 x age x Wtlbs) + (4.69 x Heightcm) + (-0.014 x Height2cm) | 79.4±21.7 | 116.4±11.4 | <0.001 | 0.06 | -37.0±24.0 | -84.09 🡪9.99 | 0.04 | -0.17-0.25 |
| Pimax ♂ | 9.8 + (-0.31 x age) + (1.47 x Wtlbs) + (-0.0026 x Wt2lbs) + (-0.0059 x age x Wtlbs) | 94.7±27.2 | 94.9±13.5 | 0.940 | 0.47 | -0.2±24.2 | -47.66🡪47.29 | 0.37 | 0.21-0.50 |
| Costa et al. (2010)11, Brazil |  |  |  |  |  |  |  |  |  |
| Pimax ♀ | (−0.46 × age) + 74.25 | 79.4±21.7 | 44.2±4.8 | <0.001 | 0.33 | 35.2±20.7 | -5.4🡪75.8 | 0.14 | -0.08-0.33 |
| Pimax ♂ | (−1.24 × age) + 232.37 | 94.7±27.2 | 148.5±11.4 | <0.001 | 0.42 | -53.8±24.8 | -102.3🡪-5.3 | 0.30 | 0.14-0.44 |
| Pemax♀ | (−0.68 × age) + 119.35 | 104.9±25.5 | 75.0±7.1 | <0.001 | 0.38 | 30.0±23.9 | -17.0🡪76.9 | 0.18 | -0.03-0.38 |
| Pemax♂ | (−1.26 × age) + 183.31 | 141.3±35.7 | 98.1±11.6 | <0.001 | 0.38 | 43.2±33.4 | -22.4🡪108.7 | 0.20 | 0.04-0.36 |
| Simões et al. (2010)12, Brazil |  |  |  |  |  |  |  |  |  |
| Pimax ♀ | (-0.85 x age) + 80.7 + (-0.3 x Wtkg) | 79.4±21.7 | 5.4±9.3 | <0.001 | 0.31 | 74.0±21.0 | 32.9 🡪115.1 | 0.21 | 0.006-0.41 |
| Pimax ♂ | (-0.76 x age) + 125 | 94.7±27.2 | 73.6±7.0 | <0.001 | 0.42 | 21.1±25.1 | -28.1🡪70.4 | 0.20 | 0.04-0.35 |
| Pemax♀ | (-0.89 x age) + 125.1 + (-0.18 x Wtkg) | 104.9±25.5 | 55.1±9.4 | <0.001 | 0.35 | 49.8±24.2 | 2.3🡪97.3 | 0.21 | -0.001-0.40 |
| Pemax♂ | (-0.83 x age) + 87.69 | 141.3±35.7 | 31.6±7.6 | <0.001 | 0.38 | 109.7±33.8 | 43.5🡪175.9 | 0.14 | -0.02-0.30 |
| Gopalakrishna et al. (2012)13 , India |  |  |  |  |  |  |  |  |  |
| Pimax ♀ | 45.98 + (6.47 x age) | 79.4±21.7 | 468.4±67.4 | <0.001 | -0.33 | -389.0±77.1 | -540.1🡪-237.8 | -0.19 | -0.40-0.02 |
| Pimax ♂ | 83.36 – (0.25 x age) | 94.7±27.2 | 66.46±2.3 | <0.001 | 0.42 | 28.3±26.3 | -23.3🡪79.9 | 0.07 | -0.10-0.23 |
| Pemax♀ | 74.85 – (0.32 x age) | 104.9±25.5 | 54.0±3.3 | <0.001 | 0.38 | 51.0±24.6 | 2.9🡪99.1 | 0.09 | -0.12-0.29 |
| Pemax♂ | 133.36 – (0.907 x age) | 141.3±35.7 | 72.0±8.3 | <0.001 | 0.38 | 69.3±33.7 | 3.3🡪135.3 | 0.15 | -0.01-0.31 |
| Harik-Khan et al. (2012)14, United States of America |  |  |  |  |  |  |  |  |  |
| Pimax ♀ | 171 – (0.694 x age) + (0.861 x Wtkg) – (0.743 x Heightcm) | 79.4±21.7 | 66.9±11.6 | <0.001 | 0.25 | 12.5±22.2 | -31.1🡪56.1 | 0.18 | -0.03-0.38 |
| Pimax ♂ | 126 – (1.028 x age) + (0.343 x Wtkg) | 94.7±27.2 | 83.6±10.6 | <0.001 | 0.43 | 11.2 ±24.7 | -37.2🡪59.5 | 0.29 | 0.13-0.43 |
| Pessoa et al. (2014)15, Brazil |  |  |  |  |  |  |  |  |  |
| Pimax | 63.27 – (0.55 x age) + (0.58 x Wtkg) | 88.9±26.3 | 80.6±14.7 | <0.001 | 0.40 | 8.3±24.4 | -39.6🡪56.1 | 0.34 | 0.22-0.45 |
| Sanchez et al. (2018)16, Brazil |  |  |  |  |  |  |  |  |  |
| Pimax model 2♀ | –94.75 + (0.816 x age) – (1.822 x BMI) | 79.4±21.7 | 92.6±12.4 | <0.001 | 0.17 | -13.3±23.2 | -58.7🡪32.2 | -0.14 | -0.34-0.07 |
| Pimax model 2♂ | –108.16 + (1.307 x age) – (2.904 x BMI) | 94.7±27.2 | 100.0±16.4 | <0.001 | 0.36 | -5.7±26.8 | -58.1🡪46.8 | -0.28 | -0.43- -0.12 |
| Pemax model 2♀ | 91.58 – (0.556 x age) + (0.798 x BMI) | 104.9±25.5 | 77.7±6.9 | <0.001 | 0.32 | 27.2±24.5 | -20.8🡪75.3 | 0.14 | -0.07-0.34 |
| Pemax model 2♂ | 98.36 – (0.672 x age) + (1.759 x BMI) | 141.3±35.7 | 101.5±9.1 | <0.001 | 0.43 | 39.4±33.5 | -26.3🡪105.0 | 0.18 | 0.01-0.33 |
| Pimax model 3♀ | –95.54 + (0.748 x age) – (0.688 x Wtkg) | 79.4±21.7 | 92.2±11.1 | <0.001 | 0.25 | -12.8±22.0 | -55.9🡪30.2 | -0.19 | -0.39-0.02 |
| Pimax model 3♂ | –110.07 + (1.208 x age) – (0.942 x Wtkg) | 94.7±27.2 | 102.6±16.3 | <0.001 | 0.40 | -8.1±25.9 | -58.8 🡪42.7 | -0.34 | -0.47- -0.18 |
| Pemax model 3♀ | 87.20 – (0.506 x age ) + (0.350 x Wtkg) | 104.9±25.5 | 77.3±6.7 | <0.001 | 0.39 | 27.6±23.9 | -19.2 🡪74.4 | 0.18 | -0.03-0.38 |
| Pemax model 3♂ | 98.84 – (0.610 x age) + (0.576 x Wtkg) | 141.3±35.7 | 103.0±9.1 | <0.001 | 0.46 | 38.2±33.0 | -26.5 🡪102.9 | 0.20 | 0.03-0.35 |
| Bruschi et al. (1992)17, Italy |  |  |  |  |  |  |  |  |  |
| Pimax ♀ | 4.02 – 0.26 – (0.004 x age) + (0.47 x BSA) (from RV)  3.89 – 0.22 – (0.004 x age) + (0.52 x BSA) (from FRC) | Not tested | Not tested | Not tested | Not tested | Not tested | Not tested | Not tested | Not tested |
| Pimax ♂ | 4.02 – (0.004 x age) + (0.47 x BSA) (from RV)  3.89 – (0.004 x age) + (0.52 x BSA) (from FRC) | Not tested | Not tested | Not tested | Not tested | Not tested | Not tested | Not tested | Not tested |
| Pemax ♀ | 4.48 – 0.18 – (0.0004 x age) – (0.003 x age) + (0.25 x BSA) (from TLC)  4.54 – 0.35 – (0.003 x age) + (0.24 x BSA) (from FRC) | Not tested | Not tested | Not tested | Not tested | Not tested | Not tested | Not tested | Not tested |
| Pemax ♂ | 4.48 – 0.18 – (0.0004 x age) – (0.003 x age) + (0.25 x BSA) (from TLC)  4.54 – 0.35 – (0.003 x age) + (0.24 x BSA) (from FRC) | Not tested | Not tested | Not tested | Not tested | Not tested | Not tested | Not tested | Not tested |
| Windisch et al. (2004)18, Germany |  |  |  |  |  |  |  |  |  |
| Pimax ♀ | y + (-0.08 x age) + (0.04 x Wtkg) + (0.11x BMI)# | Not tested | Not tested | Not tested | Not tested | Not tested | Not tested | Not tested | Not tested |
| Pimax ♂ | y + (-0.04 x age) + (0.06 x Wtkg) + (0.24 x BMI)# | Not tested | Not tested | Not tested | Not tested | Not tested | Not tested | Not tested | Not tested |
| Lausted et al. (2006)19, United States of America |  | Not tested | Not tested | Not tested | Not tested | Not tested | Not tested | Not tested | Not tested |
| Pimax ♀ | 0.234 x Ln (100% - %VC) - 0.0828 | Not tested | Not tested | Not tested | Not tested | Not tested | Not tested | Not tested | Not tested |
| Pimax ♂ | 0.234 x Ln (100% - %VC) - 0.0828 | Not tested | Not tested | Not tested | Not tested | Not tested | Not tested | Not tested | Not tested |
| Pemax♀ | 0.1426 x Ln (%VC) + 0.3402 | Not tested | Not tested | Not tested | Not tested | Not tested | Not tested | Not tested | Not tested |
| Pemax♂ | 0.1426 x Ln (%VC) + 0.3402 | Not tested | Not tested | Not tested | Not tested | Not tested | Not tested | Not tested | Not tested |

Results are expressed in mean±standard deviation, unless otherwise stated. CI: confidence intervals; Pemax: maximum expiratory pressure; Pimax: maximum inspiratory pressure; rs: spearman correlation coefficient; ICC: intraclass correlation coefficient; BSC: body surface area; %VC: percentage of vital capacity; Wtlb: weight in pounds; Wtkg weight in kilograms; BMI: body mass index; RV: residual volume; TLC: Total lung capacity; FRC: Functional residual capacity; Heightcm: Height in centimeters.

*** Pemax is equal to study by the same author in 1999

#Authors were contacted for constant in the model. No response was obtained.

References

1. Black LF, Hyatt RE. Maximal respiratory pressures: normal values and relationship to age and sex. *The American review of respiratory disease.* 1969;99(5):696-702.

2. Wilson SH, Cooke NT, Edwards RH, Spiro SG. Predicted normal values for maximal respiratory pressures in caucasian adults and children. *Thorax.* 1984;39(7):535-538.

3. Enright PL, Kronmal RA, Manolio TA, Schenker MB, Hyatt RE. RESPIRATORY MUSCLE STRENGTH IN THE ELDERLY - CORRELATES AND REFERENCE VALUES. *American Journal of Respiratory and Critical Care Medicine.* 1994;149(2):430-438.

4. Enright PL, Adams AB, Boyle PJ, Sherrill DL. Spirometry and maximal respiratory pressure references from healthy Minnesota 65- to 85-year-old women and men. *Chest.* 1995;108(3):663-669.

5. Johan A, Chan CC, Chia HP, Chan OY, Wang YT. Maximal respiratory pressures in adult Chinese, Malays and Indians. *European Respiratory Journal.* 1997;10(12):2825.

6. Morales P, Sanchis J, Cordero PJ, Diez JL. [Maximum static respiratory pressures in adults. The reference values for a Mediterranean Caucasian population]. *Archivos de bronconeumologia.* 1997;33(5):213-219.

7. Neder JA, Andreoni S, Lerario MC, Nery LE. Reference values for lung function tests. II. Maximal respiratory pressures and voluntary ventilation. *Brazilian Journal of Medical and Biological Research.* 1999;32(6):719-727.

8. Hautmann H, Hefele S, Schotten K, Huber RM. Maximal inspiratory mouth pressures (PIMAX) in healthy subjects--what is the lower limit of normal? *Respiratory medicine.* 2000;94(7):689-693.

9. Wohlgemuth M, van der Kooi EL, Hendriks JC, Padberg GW, Folgering HT. Face mask spirometry and respiratory pressures in normal subjects. *Eur Respir J.* 2003;22(6):1001-1006.

10. Sachs MC, Enright PL, Hinckley Stukovsky KD, Jiang R, Barr RG. Performance of maximum inspiratory pressure tests and maximum inspiratory pressure reference equations for 4 race/ethnic groups. *Respir Care.* 2009;54(10):1321-1328.

11. Costa D, Goncalves HA, Lima LP, Ike D, Cancelliero KM, Montebelo MI. New reference values for maximal respiratory pressures in the Brazilian population. *J Bras Pneumol.* 2010;36(3):306-312.

12. Simoes RP, Deus AP, Auad MA, Dionisio J, Mazzonetto M, Borghi-Silva A. Maximal respiratory pressure in healthy 20 to 89 year-old sedentary individuals of central Sao Paulo State. *Revista brasileira de fisioterapia (Sao Carlos (Sao Paulo, Brazil)).* 2010;14(1):60-67.

13. Gopalakrishna A, Vaishali K, Prem V, Aaron P. Normative values for maximal respiratory pressures in an Indian Mangalore population: A cross-sectional pilot study. *Lung India : official organ of Indian Chest Society.* 2011;28(4):247-252.

14. Harik-Khan RI, Wise RA, Fozard JL. Determinants of maximal inspiratory pressure. The Baltimore Longitudinal Study of Aging. *Am J Respir Crit Care Med.* 1998;158(5 Pt 1):1459-1464.

15. Pessoa IMBS, Houri Neto M, Montemezzo D, Silva LAM, Andrade ADD, Parreira VF. Predictive equations for respiratory muscle strength according to international and Brazilian guidelines. *Brazilian Journal of Physical Therapy.* 2014;18:410-418.

16. Sanchez FF, Araújo da Silva CD, de Souza Pereira Gama Maciel MC, Rebouças Demósthenes Marques J, Brosina de Leon E, Lins Gonçalves R. Predictive equations for respiratory muscle strength by anthropometric variables. *The Clinical Respiratory Journal.* 2018;12(7):2292-2299.

17. Bruschi C, Cerveri I, Zoia MC, et al. Reference values of maximal respiratory mouth pressures: a population-based study. *The American review of respiratory disease.* 1992;146(3):790-793.

18. Windisch W, Hennings E, Sorichter S, Hamm H, Criee CP. Peak or plateau maximal inspiratory mouth pressure: which is best? *Eur Respir J.* 2004;23(5):708-713.

19. Lausted CG, Johnson AT, Scott WH, Johnson MM, Coyne KM, Coursey DC. Maximum static inspiratory and expiratory pressures with different lung volumes. *Biomedical engineering online.* 2006;5:29.
